# Supplementary figures and images for: Investigating lipid headgroup composition within epithelial membranes: a systematic review
Source: Royal Society of Chemistry journal article supplement (doi:10.1039/d1sm00703c), 2021-01-01

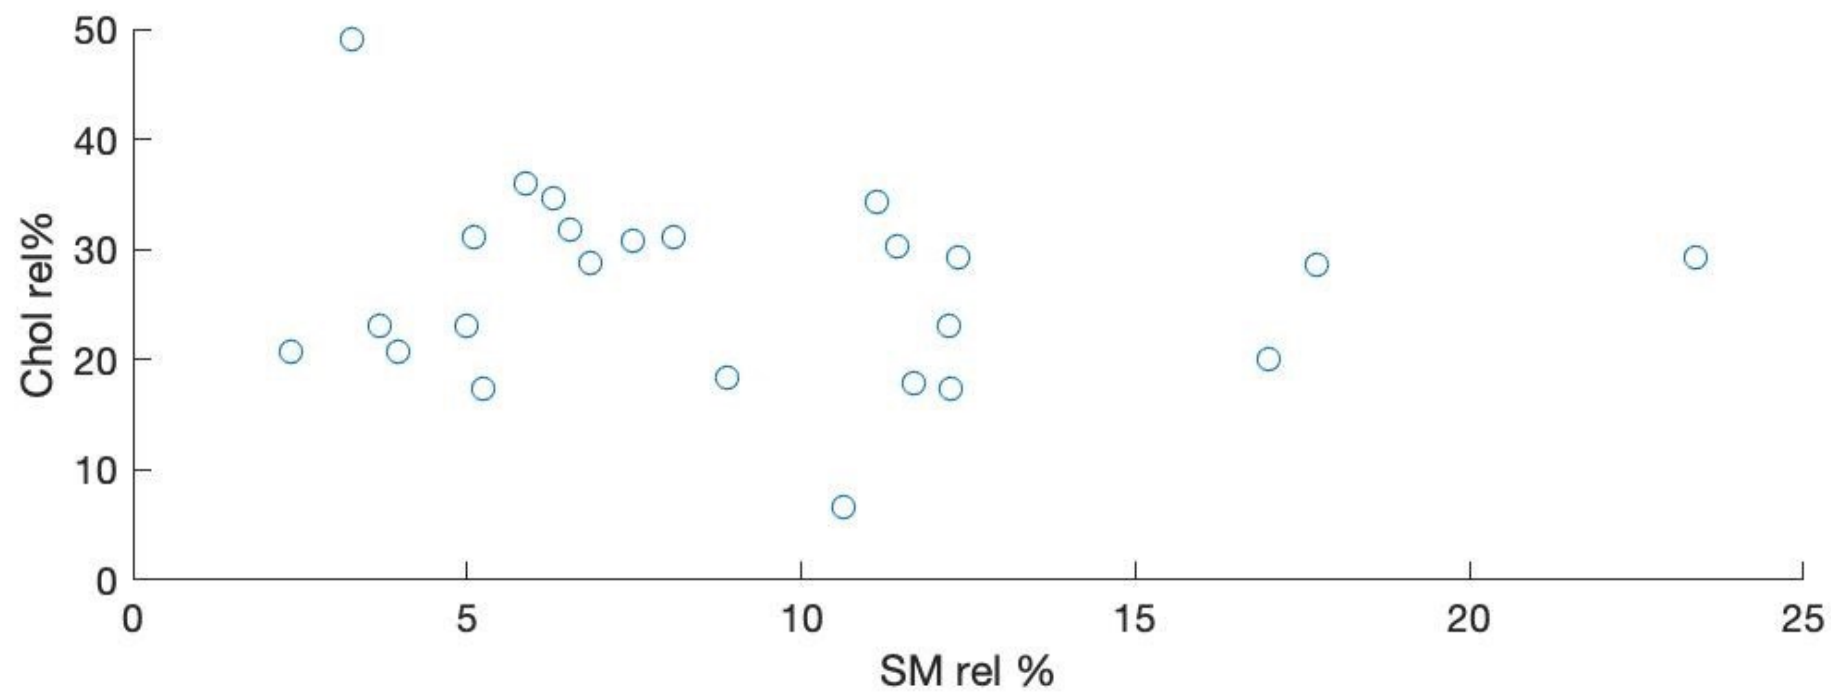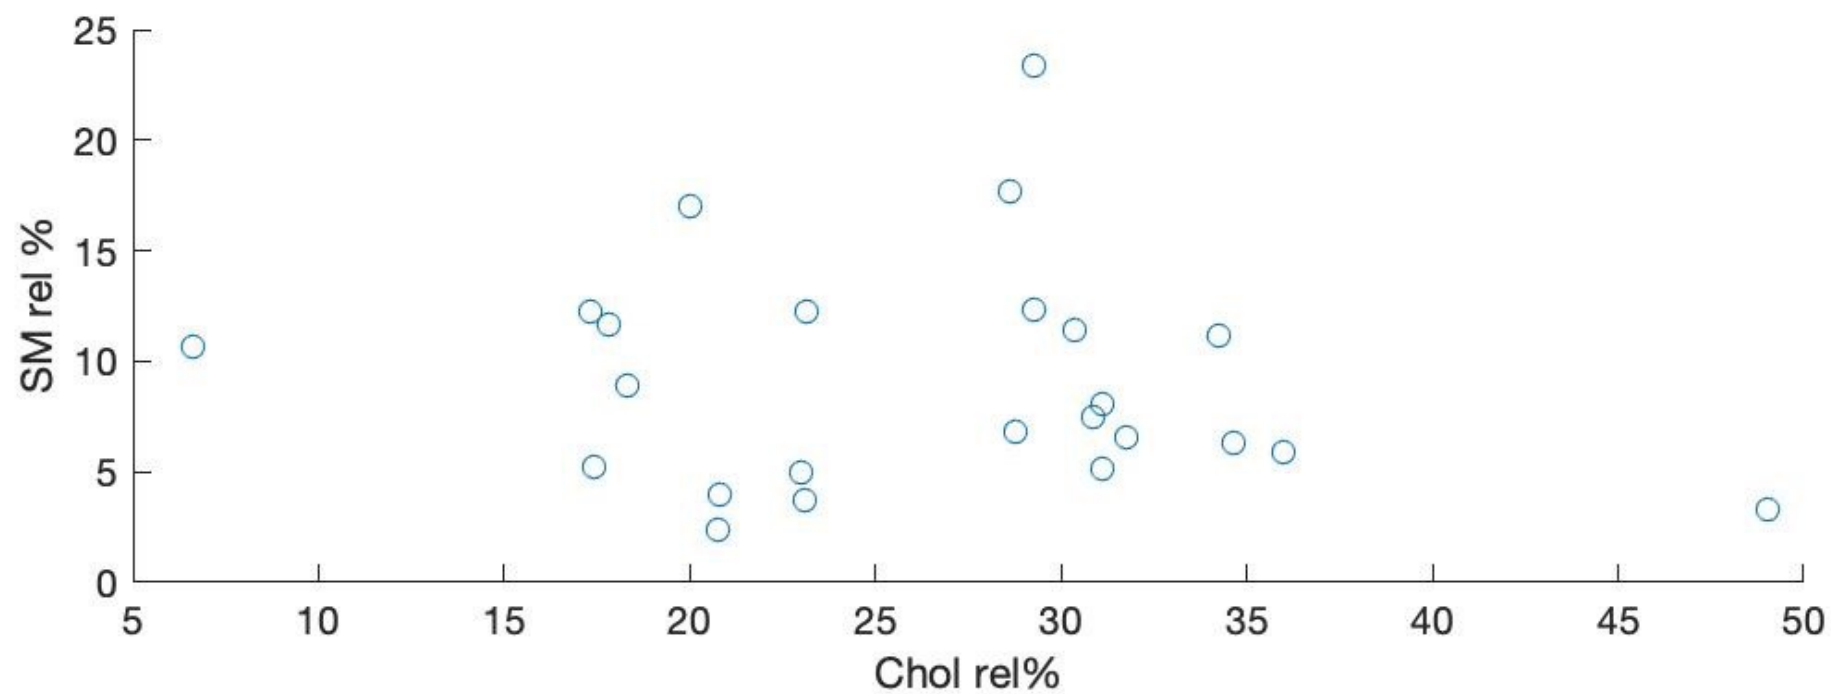

Supplement: d1sm00703c12.pdf [file d1sm00703c12.pdf]

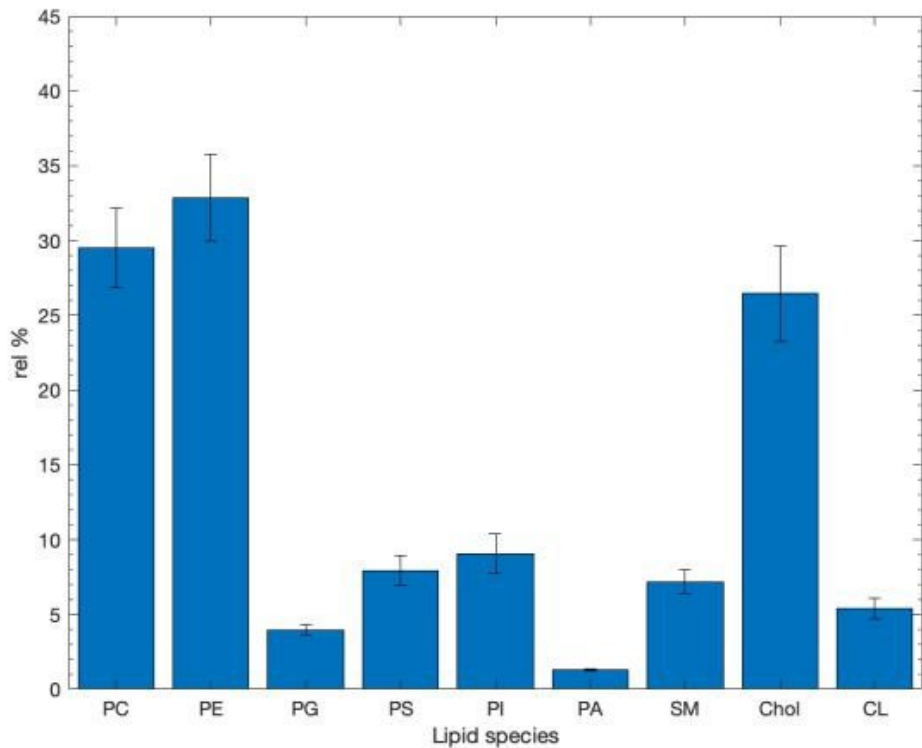

Supplement: d1sm00703c2.pdf [file d1sm00703c2.pdf]

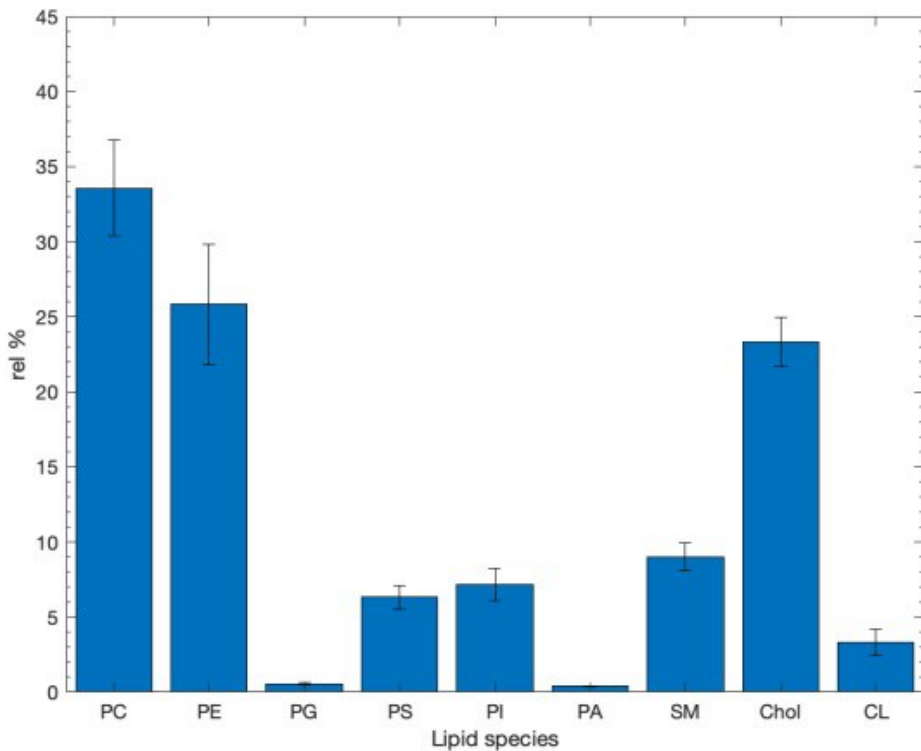

Supplement: d1sm00703c3.pdf [file d1sm00703c3.pdf]

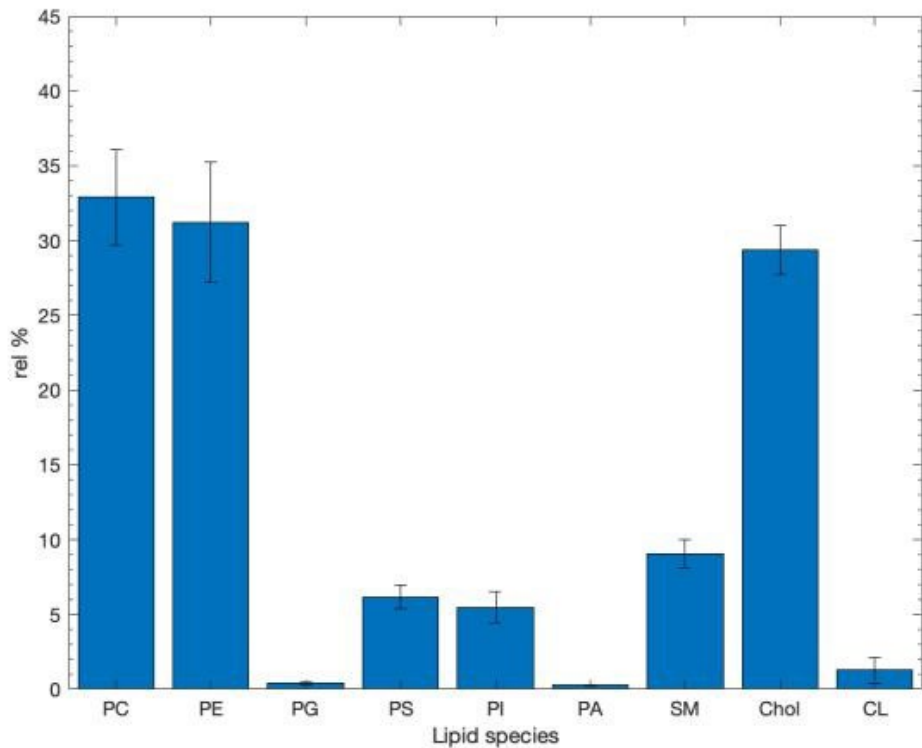

Supplement: d1sm00703c4.pdf [file d1sm00703c4.pdf]

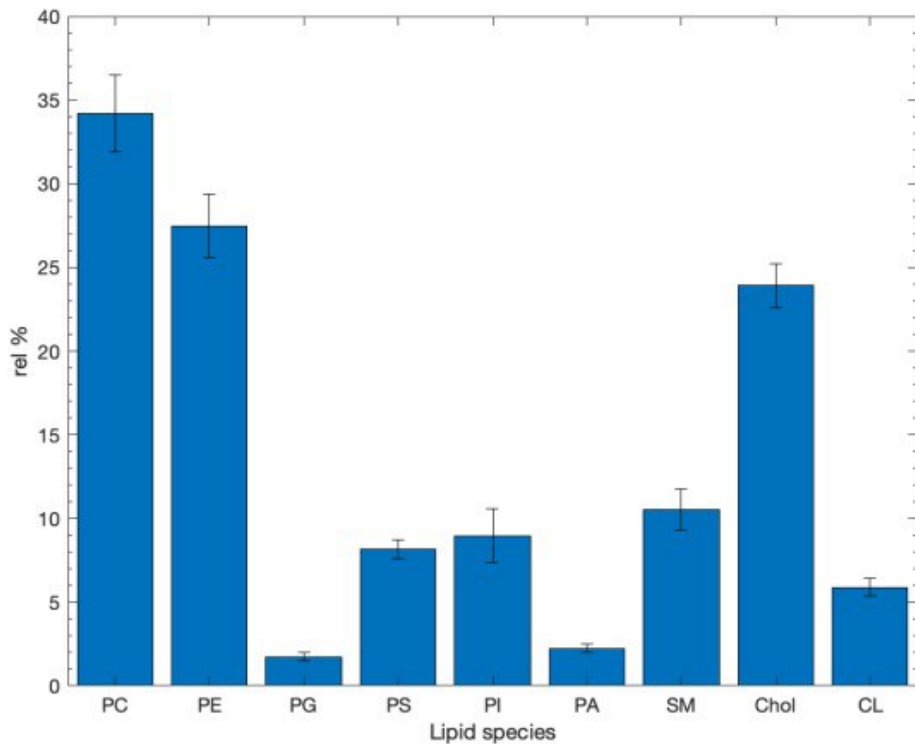

Supplement: d1sm00703c5.pdf [file d1sm00703c5.pdf]

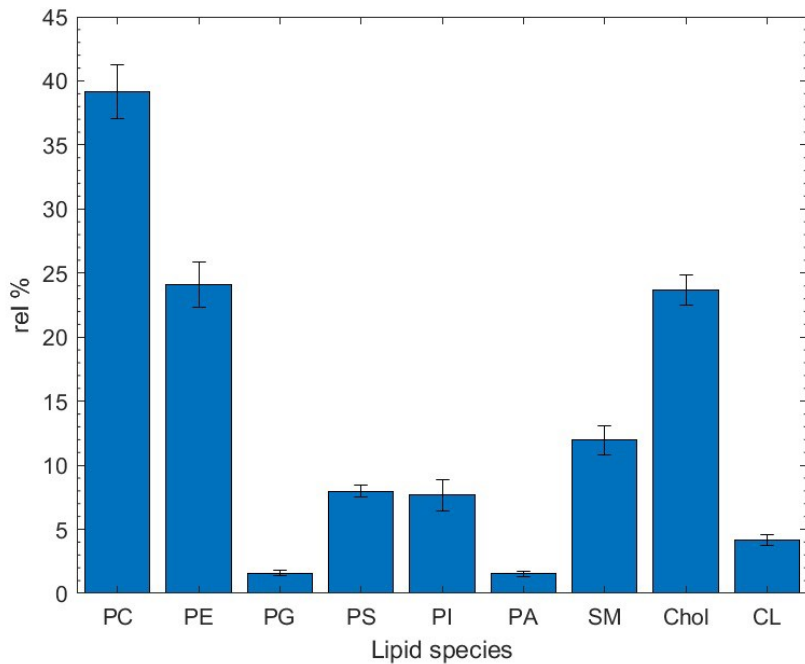

Supplement: d1sm00703c7.pdf [file d1sm00703c7.pdf]

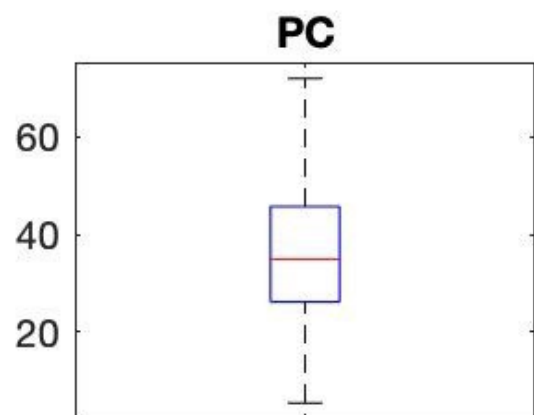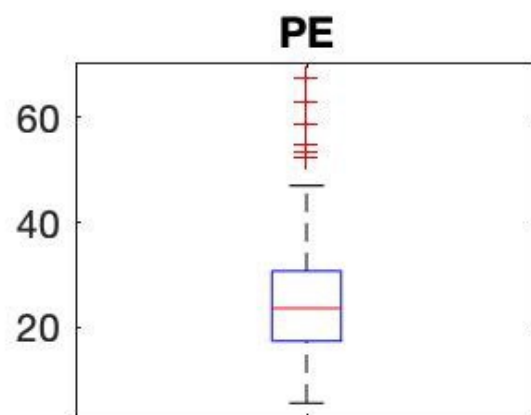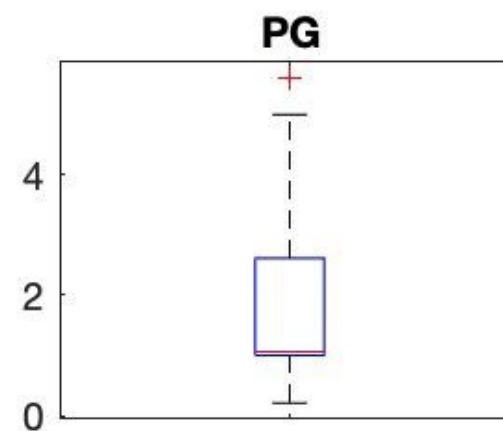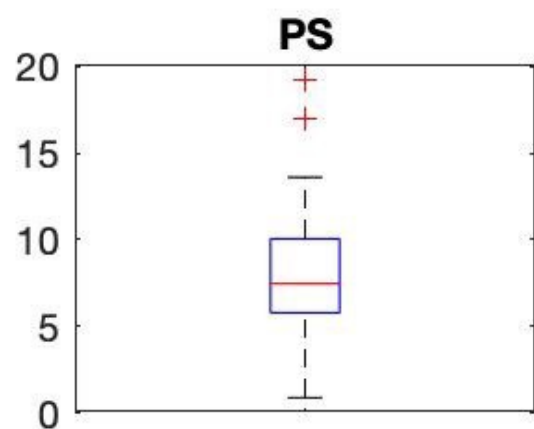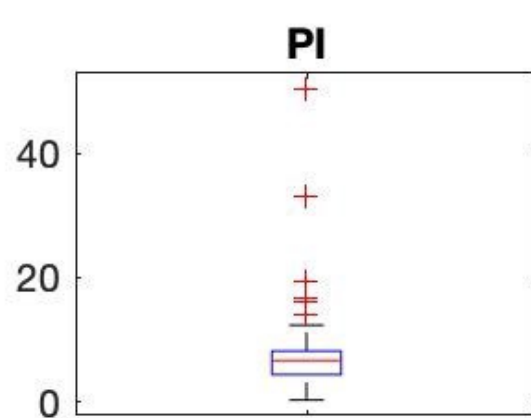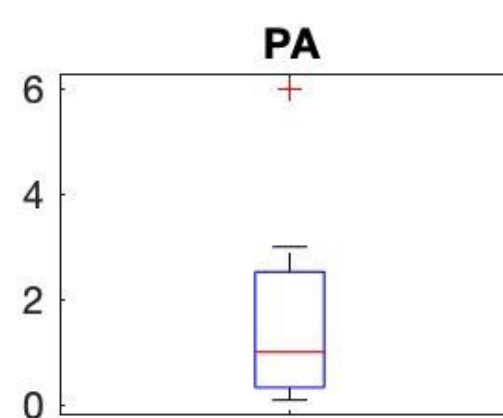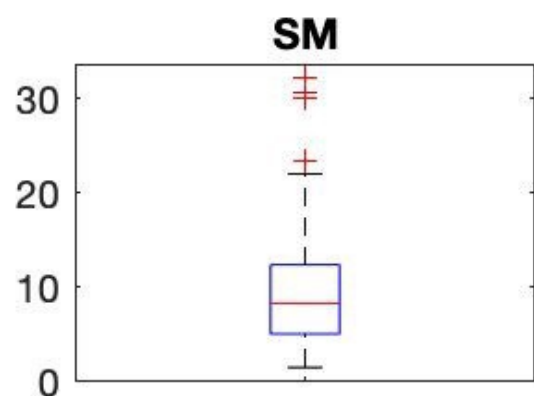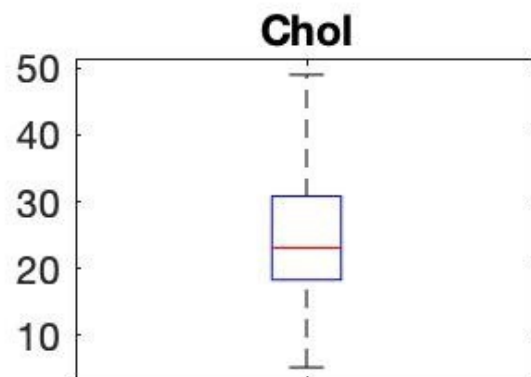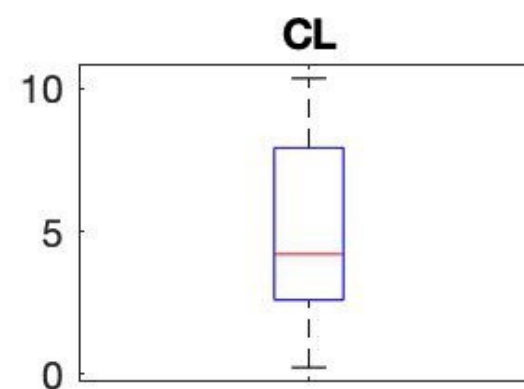

Supplement: d1sm00703c8.pdf [file d1sm00703c8.pdf]

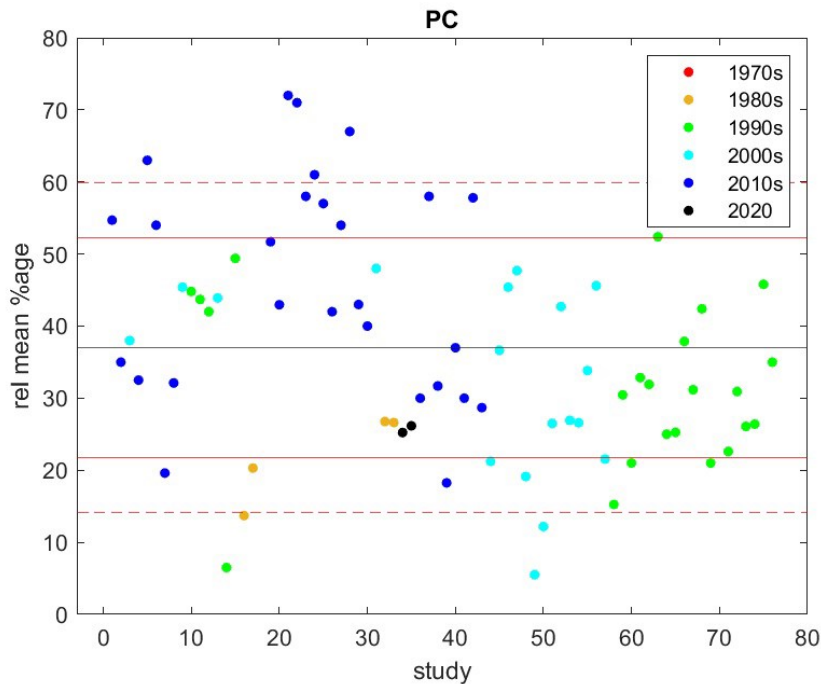

Supplement: d1sm00703c9.pdf [file d1sm00703c9.pdf]
